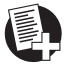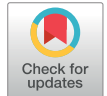

# Retention Among Participants in the National Diabetes Prevention Program Lifestyle Change Program, 2012–2017

Michael J. Cannon,<sup>1</sup> Svetlana Masalovich,<sup>2</sup>  
Boon Peng Ng,<sup>3</sup> Robin E. Soler,<sup>1</sup>  
Rajai Jabrah,<sup>4</sup> Elizabeth K. Ely,<sup>1</sup> and  
Bryce D. Smith<sup>1</sup>

*Diabetes Care* 2020;43:2042–2049 | <https://doi.org/10.2337/dc19-2366>

## OBJECTIVE

To assess retention in the National Diabetes Prevention Program (DPP) lifestyle change program, which seeks to prevent type 2 diabetes in adults at high risk.

## RESEARCH DESIGN AND METHODS

We analyzed retention among 41,203 individuals who enrolled in Centers for Disease Control and Prevention (CDC)-recognized in-person lifestyle change programs at organizations that submitted data to CDC's Diabetes Prevention Recognition Program during January 2012–February 2017.

## RESULTS

Weekly attrition rates were typically <1–2% but were between 3.5% and 5% at week 2 and at weeks 17 and 18, where session frequency typically transitions from weekly to monthly. The percentage of participants retained through 18 weeks varied by age (45.9% for 18–29 year olds, 53.4% for 30–44 year olds, 60.2% for 45–54 year olds, 66.7% for 55–64 year olds, and 67.6% for ≥65 year olds), race/ethnicity (70.5% for non-Hispanic whites, 60.5% for non-Hispanic blacks, 52.6% for Hispanics, and 50.6% for other), mean weekly percentage of body weight lost (41.0% for ≤0% lost, 66.2% for >0% to <0.25% lost, 72.9% for 0.25% to <0.5% lost, and 73.9% for ≥0.5% lost), and mean weekly physical activity minutes (12.8% for 0 min, 56.1% for >0 to <60 min, 74.8% for 60 to <150 min, and 82.8% for ≥150 min) but not by sex (63.0% for men and 63.1% for women).

## CONCLUSIONS

Our results demonstrate the need to identify strategies to improve retention, especially among individuals who are younger or are members of racial/ethnic minority populations and among those who report less physical activity or less early weight loss. Strategies that address retention after the first session and during the transition from weekly to monthly sessions offer the greatest opportunity for impact.

An estimated 30.3 million people in the U.S. have diabetes (1). Diabetes is associated with millions of hospitalizations each year for major cardiovascular diseases; can lead to other serious outcomes such as chronic kidney disease, vision loss, and lower-extremity amputation; and is the seventh leading cause of death (1). Furthermore, individuals with diabetes incur increased medical expenditures (2,3), with direct and

<sup>1</sup>Translation, Health Education, and Evaluation Branch, Division of Diabetes Translation, Centers for Disease Control and Prevention, Atlanta, GA

<sup>2</sup>CyberData Technologies, Inc., Herndon, VA

<sup>3</sup>College of Nursing and Disability, Aging and Technology Cluster, University of Central Florida, Orlando, FL

<sup>4</sup>DB Consulting Group, Bethesda, MD

Corresponding author: Michael J. Cannon, [mcannon@cdc.gov](mailto:mcannon@cdc.gov)

Received 25 November 2019 and accepted 28 April 2020

The findings and conclusions in this report are those of the authors and do not necessarily represent the official position of the Centers for Disease Control and Prevention.

© 2020 by the American Diabetes Association. Readers may use this article as long as the work is properly cited, the use is educational and not for profit, and the work is not altered. More information is available at <https://www.diabetesjournals.org/content/license>.

See accompanying article, p. 1994.

indirect costs in the U.S. estimated at \$327 billion in 2017 (4). Type 2 diabetes, the most common form, is typically preceded by prediabetes, which is estimated to occur in 84.1 million adults (1).

The Diabetes Prevention Program (DPP) study and its associated translation studies showed that, among individuals with prediabetes, the development of type 2 diabetes can be prevented or delayed through weight loss and increased physical activity (5–7). Many individuals have effectively made these changes by participating in the National Diabetes Prevention Program (National DPP) of the Centers for Disease Control and Prevention (CDC) lifestyle change program (8). The CDC's Diabetes Prevention Recognition Program (DPRP) ensures fidelity to the proven behavioral intervention structure of the DPP studies and monitors the achievement of outcomes associated with diabetes prevention. This yearlong program consists of a minimum of 22 sessions offered over the course of a year. Because the program has a relatively low cost to deliver and can prevent the many serious sequelae of diabetes, it is cost-effective, especially when delivered to groups in community or primary care settings (9) according to CDC recognition standards (10).

Success in the CDC National DPP lifestyle change program is strongly associated with retention (8,11–13). Most participants who stay in the program at least 6 months achieve program goals for weight change ( $\geq 5\%$ ) and weekly physical activity ( $\geq 150$  min). The likelihood of achieving these goals increases throughout that time frame, highlighting the importance of participant retention. Nevertheless, many participants who begin the program do not complete it. A recent literature review concluded that retention in similar programs may be associated with a variety of demographic, behavioral, psychological, and structural factors (14).

To better understand factors that may be associated with retention in the National DPP lifestyle change program, we examined data collected by CDC through its DPRP (10). In particular, we focused our analyses on factors that could help programs and coaches identify individuals at risk for attrition (e.g., age, race/ethnicity) or make programmatic adjustments that could increase retention (e.g., physical activity or early weight loss).

## RESEARCH DESIGN AND METHODS

### Population, Time Frame, and Exclusion Criteria

To be eligible for participation in the National DPP lifestyle change program during the time period these data were collected, participants needed to 1) be at least 18 years of age, 2) have prediabetes identified by a blood test or a self-reported risk test or have a history of gestational diabetes mellitus (GDM), and 3) have a BMI  $\geq 24$  kg/m<sup>2</sup> for non-Asians and  $\geq 22$  kg/m<sup>2</sup> for Asians. Because so few participants in our data set had BMI  $< 24$  kg/m<sup>2</sup>, we restricted our analyses to participants with BMI  $\geq 24$  kg/m<sup>2</sup>. To allow sufficient time to assess participant retention, we only examined records from participants who had the opportunity to attend for at least 1 year. While organizations are expected to offer a minimum of six monthly sessions in months 7–12 of the program, we know there is variability in the number of sessions actually being offered during these months. For this reason, we limited our retention analysis to the first 44 weeks.

The National DPP lifestyle change program can be offered in person, online, through distance learning, or through a combination of these modalities, and retention issues are somewhat different in each case. For this article, we restricted our analyses to data collected from in-person programs.

### Data Description

The data used for this analysis include National DPP records submitted to CDC by 581 recognized organizations that participated in the DPRP from January 2012 to February 2017. During this time, recognized organizations were required to submit data to CDC every 6 or 12 months depending on the version of the CDC standards under which the program was currently operating (15). Data submission included one record for each session attended by each participant during the preceding year. After the previously described exclusions and restrictions, we conducted our analyses with data from 41,203 participants.

### Variables

Information collected included the date of attended session, age, sex, race/ethnicity, program eligibility category (blood test, risk test, history of GDM), height, weight, and self-reported physical activity minutes

during the preceding week. With this information, we calculated BMI, mean percent change in a participant's weight per week, mean physical activity minutes per week, and number of attended sessions. If any entries seemed implausible for weight (e.g., weight difference between sessions  $> 5\%$ ), we set these values to missing.

Despite the program having a prescribed intensity and duration, not all organizations follow these exactly. In addition, many participants miss sessions. For these reasons, participant entries for weight are not always recorded at prescribed intervals. Furthermore, some entries for physical activity minutes may have been missing because many organizations do not require the recording of physical activity minutes until the topic has been introduced in the curriculum (typically during the fifth session).

We calculated both the percent retained and weekly attrition rates. The percent retained through a given week was defined as the ratio of the number of participants who remained in the program and the number of participants present during the 1st week in the program, multiplied by 100%. The weekly attrition rate was defined as the ratio of the number of participants leaving the program at a given week to the number of participants present during the 1st week in the program, multiplied by 100%. A participant was considered to be retained in the program through a given week if he or she attended a session that week or during a subsequent week. We considered the first session attended, regardless of the session number, week one.

Mean physical activity minutes were calculated as the cumulative number of minutes reported by the participant by a given week (i.e., at all sessions where he or she reported physical activity minutes up to the given week) divided by the number of sessions for which physical activity was reported. For a given week, a participant was excluded from analyses involving mean physical activity minutes if he or she had never reported on physical activity minutes before or during that week. Weight change was calculated for participants who attended more than one session. If a given session had a missing or implausible weight measurement but such a measurement was available for a subsequent session, we

imputed the previous value by setting it equal to the value from the subsequent session. However, this only applied to a small number of observations (<1%). Percent weight change was calculated as the difference between the participant's weight at the first session and the latest session, divided by the weight at the first session. Percent weight change per week was calculated as the percent weight change divided by the number of weeks since the first session.

### Analyses

Demographic and clinical characteristics of the population are described as means, medians, percentages, SDs, 95% CIs, and interquartile ranges (IQR). Characteristics of participants who were retained or who dropped out were compared for categorical variables by the Wald test and for continuous variables by the two-sided *t* test or the Wilcoxon test (for nonnormally distributed variables). We plotted percent retained and attrition rates by week, as well as percent retained stratified by key time-invariant variables (age, race/ethnicity, sex, weight loss by 3rd week) and time-variant variables (mean physical activity minutes per week, mean percent weight loss per week).

For the time-variant variables, we computed the percent retained through week *x* by 1) placing retained participants through week *x* into categories based on the value of the variable at that week (e.g., 0 mean physical activity minutes, 1–60 mean physical activity minutes, etc.) and 2) dividing the number of retained participants in a given category through week *x* (i.e., the numerator) by that number of participants plus all those participants who dropped out prior to week *x* but who were in that same category when they dropped out (i.e., the denominator).

We computed differences in retention proportions for several variables at weeks 4 and 18, along with corresponding CIs and *P* values. We chose to report findings from these weeks to look at both early and later effects on retention. However, when we computed differences at other weeks, we found similar associations (data not shown). We also ran a multivariate predictive model to identify variables that were independently associated with retention at 18 weeks. Because we had a dichotomous outcome variable (i.e., retention) and participants were nested

within various organizations, we used a generalized linear mixed model with logit link and binary distribution to estimate the associations between retention and demographics, mean physical activity per week, and weight loss per week. The model included the random intercept to account for participants nested in a specific organization. All analyses were performed in SAS 9.4.

### RESULTS

Among the 41,203 in-person participants in the National DPP lifestyle change program, the mean age was 56.8 years, with the age distribution as follows: 2.4% were age 18–29 years, 14.5% were age 30–44 years, 23.0% were age 45–54 years, 29.2% were age 55–64 years, and 30.9% were age ≥65 years. Participants were more likely to be female (80.0%) than male (20.0%). Race/ethnicity was distributed as follows: 54.6% were non-Hispanic white, 14.6% non-Hispanic black, 8.6% Hispanic, and 22.2% other race/ethnicity. At baseline, the mean weight was 212.9 lb (range 96–597) and the mean BMI was 35.2 kg/m<sup>2</sup> (range 24.0–99.6), with 25.3% having BMI between 24 and 29.9 kg/m<sup>2</sup> and 74.7% having BMI ≥30 kg/m<sup>2</sup>. Program eligibility for 66.7% was determined by a glucose test or history of GDM and for 33.3% was determined by a self-reported risk test only.

Among the participants, 78.4% lost weight, 4.7% did not change weight, 12.3% gained weight by their last session, and 4.6% could not have weight change computed due to missing or implausible records. The mean physical activity per week over the time for which activity was recorded was 98.5 min.

For all participants, median retention was 28 weeks (IQR 15, 41) (Fig. 1A), and the median number of sessions attended was 16 (IQR 9, 20). Weekly attrition rates were typically <1–2% but were between 3.5% and 5% at week 2 and at weeks 17 and 18, where session frequency typically transitions from weekly to monthly (Fig. 1B). As a result, 63.1% of participants were retained in the program through the 18th week and 31.9% through the 44th week.

Retention consistently increased with age (Fig. 2A and Table 1). Absolute differences between the oldest and youngest age-groups reached 21.7 percentage points by 18 weeks (Table 1). Retention was highest among non-Hispanic whites,

followed by non-Hispanic blacks, and was lower for Hispanics and other race/ethnicity (Fig. 2B). Absolute differences between non-Hispanic white and other race/ethnicity reached 19.9 percentage points by 18 weeks (Table 1). In contrast, retention was not meaningfully different (<3%) by sex (Fig. 2C), BMI at session one, or program eligibility assessment category (Table 1).

Weight loss was strongly associated with retention (Fig. 2D). During the earlier part of the program (<25 weeks), those in the higher weekly weight loss groups had better retention in the program, especially compared with the group who did not lose weight (Fig. 3A). For example, at week 18 the percent retained in the highest weight loss group was 32.9 percentage points more than the percent retained in the no weight loss group (Table 1). However, during the later part of the program (>25 weeks), these associations were less consistent, and some of the retention plots crossed for different groups (Fig. 3A).

Physical activity was also strongly associated with retention. Throughout follow-up, participants in the groups with higher levels of physical activity consistently had better retention in the program than the groups with lower levels of physical activity (Fig. 3B). By 18 weeks, those differences became large; for example, the percent retained in the highest physical activity group was 70.0 percentage points more than the percent retained for the group with no physical activity (Table 1).

We also found that variables associated with retention in the univariate analyses tended to have similar associations in the multivariate analysis. When compared with the oldest age-group (≥65 years), younger age-groups had a lower likelihood of being retained at 18 weeks, with odds ratios (ORs) as follows: 0.42 (95% CI 0.35, 0.49) for 18–29 years, 0.61 (0.56, 0.66) for 30–44 years, 0.76 (0.71, 0.82) for 45–54 years, and 0.88 (0.82, 0.95) for 55–64 years. When compared with non-Hispanic whites, racial/ethnic minority populations had a lower likelihood of being retained at 18 weeks, with ORs as follows: 0.87 (0.79, 0.94) for non-Hispanic blacks, 0.67 (0.60, 0.75) for Hispanics, and 0.88 (0.82, 0.95) for other race/ethnicity. When compared with females, males had a slightly lower likelihood of being retained at 18 weeks (OR

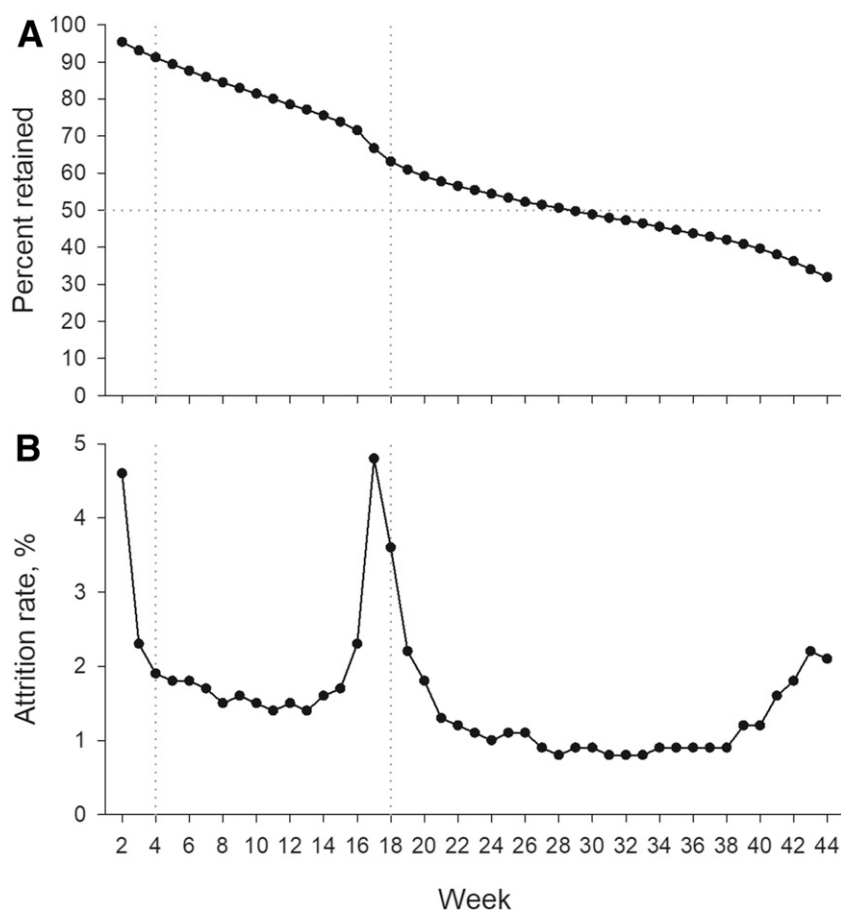

**Figure 1**—Overall retention (A) and attrition (B) among participants in the National DPP lifestyle change program.

0.94 [95% CI 0.88, 1.00]). Similarly, when compared with the group that lost the most weight ( $\geq 0.5\%$ ), other groups had a lower likelihood of being retained at 18 weeks, with ORs as follows: 0.44 (95% CI 0.40, 0.48) for  $\leq 0$ , 0.87 (0.80, 0.94) for  $>0\%$  to  $<0.25\%$ , and 0.99 (0.92, 1.07) for 0.25% to  $<0.5\%$ . Finally, when compared with the group with the most physical activity minutes ( $\geq 150$  per week), groups with lower physical activity had a lower likelihood of being retained at 18 weeks, with ORs as follows: 0.042 (0.038–0.047) for 0 min per week, 0.29 (0.27–0.31) for  $>0$  to  $<60$  min per week, and 0.61 (0.56–0.65) for 60 to  $<150$  min per week.

## CONCLUSIONS

The main findings of our study were as follows: 1) half of participants in the National DPP lifestyle change program were retained past 28 weeks, and the median number of sessions attended was 16; 2) attrition was highest at week 2 and at weeks 17 and 18; 3) lower retention was strongly and independently associated

with younger age and minority race/ethnicity, but not with sex, although enrollment of women was fourfold higher than that of men; and 4) lower retention was strongly and independently associated with less weight loss and less physical activity during preceding weeks.

Our findings suggest that although retention needs improvement, organizations are having success in retaining one-half of participants past 28 weeks, which previous studies have shown is sufficient time to achieve program goals related to weight loss and physical activity. Our retention results were similar to those reported in 2017 using an earlier subset ( $\sim 36\%$ ) of the National DPP data (8). That study showed that individuals who stayed in the program longer tended to have greater weight loss and increased physical activity. Weight loss and physical activity were strongly associated with the prevention or delay of type 2 diabetes among the participants in the DPP randomized controlled trial (5,16).

There are specific time periods during which participants have a substantially higher risk of dropping out. Specifically, attrition is highest immediately after the 1st week and between 16 and 19 weeks. At the 1st week, attrition may be related to a misunderstanding of program expectations. One promising approach for clarifying expectations and marketing the program is through a so-called “Session Zero,” which a number of program delivery organizations have experimented with and which may improve retention and weight loss (17). For weeks 16–19, attrition is likely to be related to the program transition from weekly to monthly sessions. Anecdotally, some programs have recognized this issue and made the transition more gradual by moving to bimonthly sessions before eventually extending to monthly sessions. Future research may help to determine what leads participants to drop out of the program at these points, as well as identify new approaches to limit this attrition.

Several studies have examined demographic factors associated with retention in behavioral interventions among adults at high risk for type 2 diabetes. Similar to our findings, in these studies better retention is consistently associated with older age (14,18–25). Some studies have also found that retention is lower among racial/ethnic minorities or immigrants (25–27), although these findings are less consistent across studies (24). Future research should seek to identify barriers and facilitators for retention among participants who are younger and/or racial/ethnic minorities.

Although we found that in-person enrollment in the National DPP lifestyle change program was approximately four times greater for women compared with men, we did not observe differences in retention by sex. We hypothesize that this lack of difference may result because the men and women who choose to participate in the National DPP lifestyle change program are different from men and women in the general population and share characteristics that make them more likely to continue to participate in disease prevention programs. Similarly, two literature reviews have not found consistent associations between sex and retention (14,24).

Importantly, a participant’s success with weight loss and physical activity, especially early on, was a key predictor

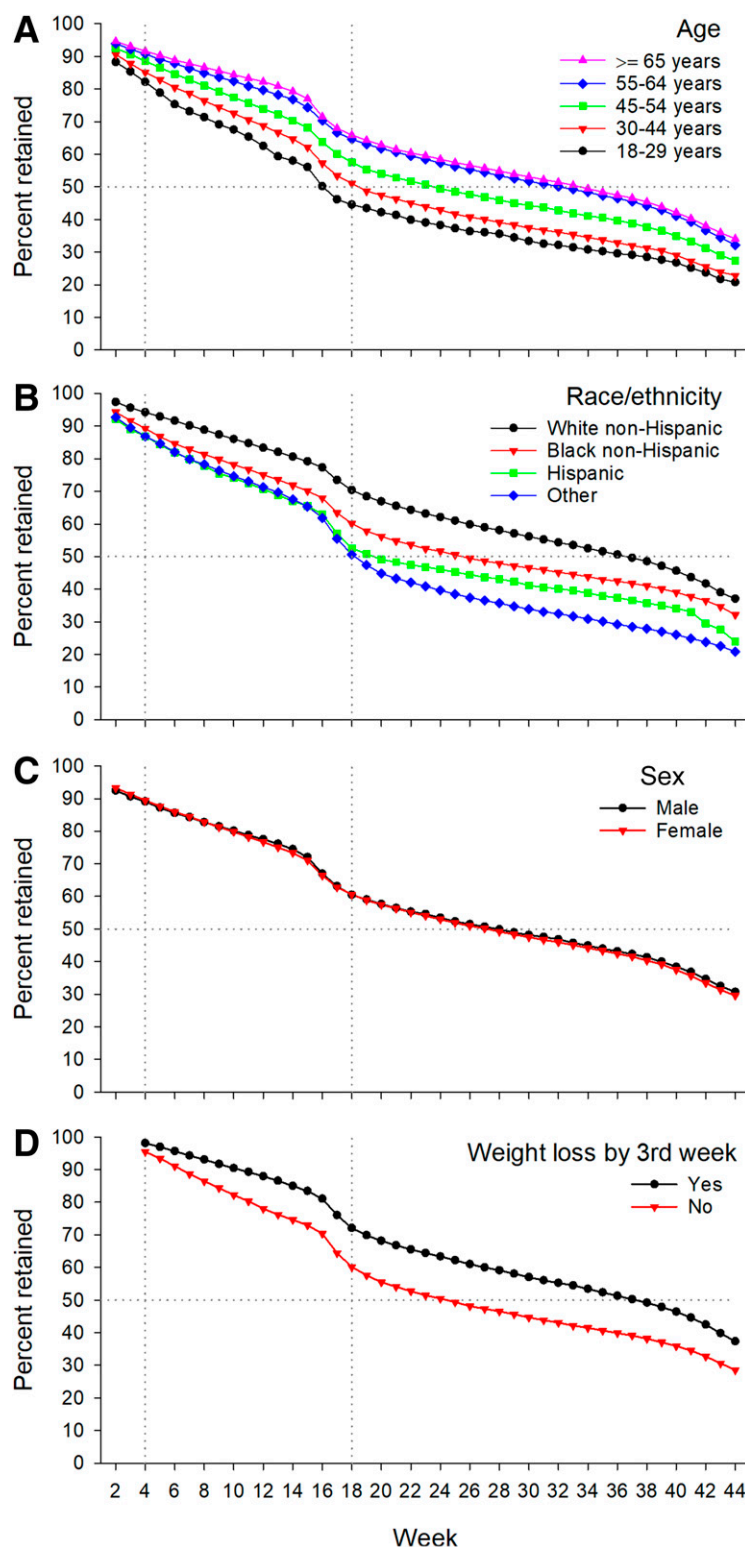

**Figure 2**—Percent retained by week in the National DPP lifestyle change program, stratified by selected time-invariant variables: age (A), race/ethnicity (B), sex (C), and weight loss by the 3rd week (D).

of retention. Of note, mean percent weight loss was less predictive of retention after ~25 weeks (i.e., some of the different weight loss group plots crossed [Fig. 3A]). We hypothesize that

some highly successful participants may leave the program at this point because they feel they have lost enough weight. Our results are consistent with the well-established finding from weight loss trials

that early weight loss is a strong predictor of retention (28), suggesting that “early nonresponders” to weight loss could receive adaptive interventions to improve their outcomes. In one review, three studies found that more physical activity was a predictor of retention, while the remaining five studies did not find an association (24). Importantly, retention is not only predictive of good outcomes; our results show that early good outcomes (i.e., weight loss and physical activity) can predict further program retention.

These predictors of retention represent opportunities for program improvement. An increased focus on early successes in weight loss and physical activity might be considered for the curriculum and emphasized by coaches. Furthermore, programs and coaches might target their early retention efforts on participants who are struggling to find early successes. Several additional retention strategies have been proposed in the literature, including health care provider referrals (29), nonmonetary incentives (29), partner enrollment (30), and recruiting participants who are ready to change behavior (11). In addition, Venditti et al. (31) found that many participant barriers can be successfully addressed through behavioral problem-solving approaches that lifestyle change coaches can be trained to use.

A strength of our study is that it is one of the largest analyses of retention in a chronic disease prevention program. We studied the records of >40,000 individuals, and the follow-up time captured was up to 1 year, which is longer than many studies of weight loss or chronic disease prevention. Furthermore, we were able to capture data from all in-person CDC-recognized program delivery organizations, thus presenting a broad picture of much of the National DPP to date. In addition, our predictive modeling was able to demonstrate that several variables were independent predictors of retention.

Study limitations included that we were only able to examine retention for a limited number of variables. Because the CDC's DPRP data set is derived from a recognition program rather than a public health surveillance system, it contains a limited range of variables and is lacking information on psychological, sociological, or behavioral characteristics, with the



**Table 1—Retention in CDC's National DPP lifestyle change program, stratified by various factors at weeks 4 and 18**

| Variable                                     | Week 4          |                  |                                            |        | Week 18         |                  |                                            |        |
|----------------------------------------------|-----------------|------------------|--------------------------------------------|--------|-----------------|------------------|--------------------------------------------|--------|
|                                              | Number retained | Percent retained | Difference from referent category (95% CI) | P*     | Number retained | Percent retained | Difference from referent category (95% CI) | P*     |
| <b>Age (years)</b>                           |                 |                  |                                            |        |                 |                  |                                            |        |
| 18–29                                        | 856             | 85.3             | 7.4 (5.2, 9.6)                             | <0.001 | 461             | 45.9             | 21.7 (18.5, 24.9)                          | <0.001 |
| 30–44                                        | 5,237           | 87.8             | 4.8 (3.9, 5.8)                             | <0.001 | 3,187           | 53.4             | 14.2 (12.7, 15.7)                          | <0.001 |
| 45–54                                        | 8,599           | 90.7             | 2.0 (1.3, 2.8)                             | <0.001 | 5,711           | 60.2             | 7.4 (6.1, 8.7)                             | <0.001 |
| 55–64                                        | 11,093          | 92.3             | 0.4 (–0.2, 1.1)                            | 0.219  | 8,021           | 66.7             | 0.9 (–0.3, 2.1)                            | 0.123  |
| ≥65 (referent)                               | 11,794          | 92.7             |                                            |        | 8,607           | 67.6             |                                            |        |
| <b>Race/ethnicity</b>                        |                 |                  |                                            |        |                 |                  |                                            |        |
| Other                                        | 7,940           | 86.8             | 7.4 (6.7, 8.2)                             | <0.001 | 4,627           | 50.6             | 19.9 (18.7, 21.1)                          | <0.001 |
| Hispanic                                     | 3,088           | 86.9             | 7.3 (6.2, 8.5)                             | <0.001 | 1,870           | 52.6             | 17.9 (16.1, 19.6)                          | <0.001 |
| Non-Hispanic black                           | 5,357           | 89.3             | 5.0 (4.1, 5.8)                             | <0.001 | 3,631           | 60.5             | 10.0 (8.6, 11.4)                           | <0.001 |
| Non-Hispanic white (referent)                | 21,194          | 94.2             |                                            |        | 15,859          | 70.5             |                                            |        |
| <b>Sex</b>                                   |                 |                  |                                            |        |                 |                  |                                            |        |
| Male                                         | 7,483           | 90.6             | 0.7 (0.0, 1.4)                             | 0.046  | 5,197           | 63.0             | 0.1 (–1.0, 1.3)                            | 0.808  |
| Female (referent)                            | 30,096          | 91.3             |                                            |        | 20,790          | 63.1             |                                            |        |
| <b>Test for prediabetes</b>                  |                 |                  |                                            |        |                 |                  |                                            |        |
| Risk test only                               | 12,437          | 90.6             | 0.8 (0.3, 1.4)                             | 0.004  | 8,412           | 61.3             | 2.6 (1.7, 3.6)                             | <0.001 |
| Glucose test/GDM (referent)                  | 25,142          | 91.5             |                                            |        | 17,575          | 64.0             |                                            |        |
| <b>BMI at session one (kg/m<sup>2</sup>)</b> |                 |                  |                                            |        |                 |                  |                                            |        |
| 24–29.9                                      | 9,489           | 91.1             | 0.1 (–0.5, 0.8)                            | 0.663  | 6,715           | 64.5             | –1.9 (–2.9, –0.8)                          | <0.001 |
| ≥30 (referent)                               | 28,090          | 91.2             |                                            |        | 19,272          | 62.6             |                                            |        |
| <b>Weight loss by 3rd week</b>               |                 |                  |                                            |        |                 |                  |                                            |        |
| No                                           | 6,840           | 95.5             | 2.6 (2.1, 3.1)                             | <0.001 | 4,349           | 60.7             | 11.4 (10.2, 12.7)                          | <0.001 |
| Yes (referent)                               | 24,051          | 98.1             |                                            |        | 17,687          | 72.2             |                                            |        |
| <b>Weight loss per week (%)</b>              |                 |                  |                                            |        |                 |                  |                                            |        |
| ≤0                                           | 7,331           | 90.2             | 7.1 (6.4, 7.8)                             | <0.001 | 2,370           | 41.0             | 32.9 (31.3, 34.5)                          | <0.001 |
| >0 to <0.25                                  | 5,913           | 96.3             | 1.0 (0.5, 1.6)                             | <0.001 | 8,965           | 66.2             | 7.7 (6.4, 9.0)                             | <0.001 |
| 0.25 to <0.5                                 | 9,181           | 96.7             | 0.6 (0.2, 1.1)                             | 0.003  | 9,486           | 72.9             | 1.1 (–0.2, 2.3)                            | 0.109  |
| ≥0.5 (referent)                              | 14,477          | 97.3             |                                            |        | 5,104           | 73.9             |                                            |        |
| <b>Mean physical activity per week (min)</b> |                 |                  |                                            |        |                 |                  |                                            |        |
| 0                                            | 21,111          | 87.8             | 8.6 (7.9, 9.4)                             | <0.001 | 764             | 12.8             | 70.0 (68.8, 71.1)                          | <0.001 |
| >0 to <60                                    | 6,727           | 95.8             | 0.5 (–0.2, 1.3)                            | 0.191  | 5,652           | 56.1             | 26.7 (25.4, 27.9)                          | <0.001 |
| 60 to <150                                   | 6,421           | 96.1             | 0.3 (–0.5, 1.1)                            | 0.467  | 11,755          | 74.8             | 7.9 (6.9, 8.9)                             | <0.001 |
| ≥150 (referent)                              | 3,320           | 96.4             |                                            |        | 7,816           | 82.8             |                                            |        |

\*Computed using the Wald test.

exception of self-reported physical activity. Such variables may play an important role in retention. Reviews have concluded (14,24) that retention is more closely associated with psychological and behavioral variables than with demographic variables. For example, retention in behavioral change programs has been associated with factors such as partner enrollment in the study, perceived stress, self-efficacy, marital status, financial incentives, smoking status, depression, education, or employment (14,19,22,32–38). The DPRP database does not include these variables, and therefore, we were unable to examine

how they were related to retention. Such variables will likely need to be assessed in other research studies, since the CDC recognition program must minimize the data collection burden it imposes on program delivery organizations.

A further limitation is that we were unable to address how enrollment and retention are related to poverty and social determinants associated with diabetes-related disparities. Future research might use databases such as the American Community Survey and Social Vulnerability Index (<https://svi.cdc.gov>) to examine how the community environment is related to the geographic location of lifestyle change

programs and to enrollment and retention in these programs.

Another important limitation relates to the fact that CDC-recognized organizations are allowed multiple enrollments in the DPRP. Thus, organizations that are not on a successful course can withdraw from the DPRP and then reapply for recognition once programmatic issues have been addressed. When this occurs, the organization is not allowed to carry over to their new enrollment any classes that were ongoing at the time of withdrawal. For this reason, if any session records for these participants have already been submitted, they appear in

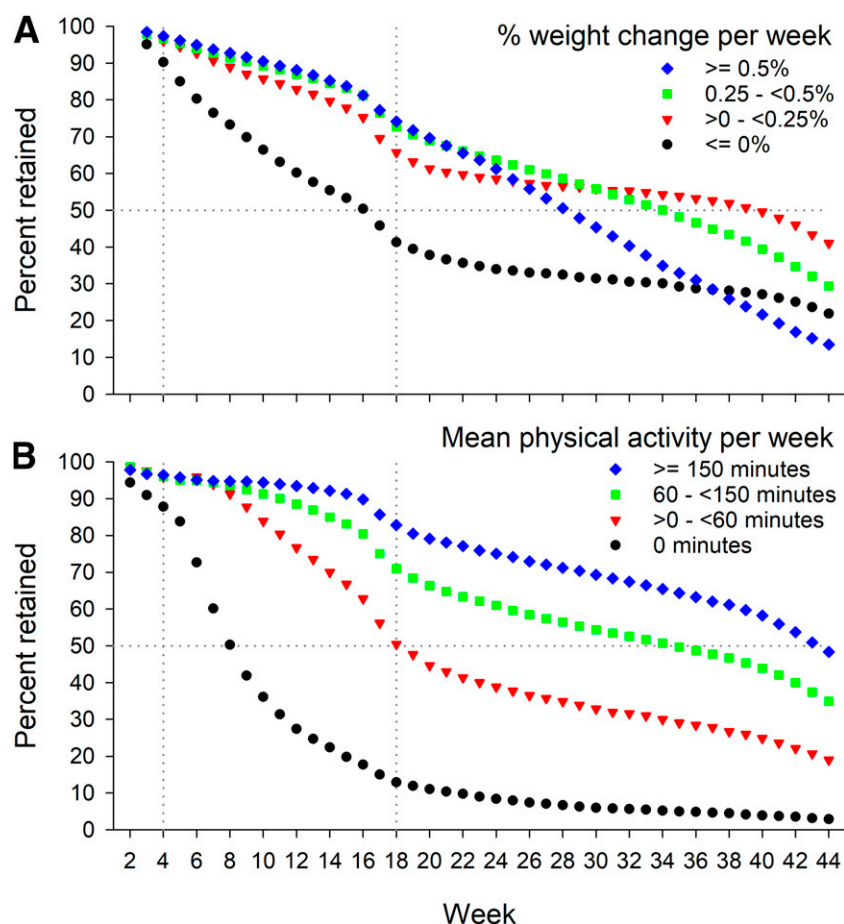

**Figure 3**—Percent retained by week in the National DPP lifestyle change program, stratified by selected time-variant variables: mean percent weight change per week (A) and mean physical activity minutes per week (B).

this analysis as participants who left the program early. In these instances, we have no way to determine whether the organization allowed the participants to complete the program or whether the participants chose to discontinue their attendance. Anecdotally, we are aware that some of these participants do continue attending sessions, which suggests that our results may somewhat underestimate overall retention.

Finally, because we restricted our analyses to data collected from in-person programs, we could not conclude whether retention was associated with the same variables in online, distance learning, or combination programs. We plan to explore retention in these programs in future analyses.

In conclusion, many CDC-recognized organizations delivering the National DPP lifestyle change program are successful in retaining participants, but key opportunities exist for increasing retention. These opportunities relate to improving

retention after particular sessions (e.g., between sessions 1 and 2), participant characteristics (e.g., age and race/ethnicity), and participant behaviors (e.g., weekly physical activity). In our future research, we plan to focus on these high-impact opportunities in order to develop strategies for improved retention, thus increasing the number of individuals who prevent or delay the development of type 2 diabetes.

**Acknowledgments.** The authors thank the members of the National DPP team who contributed to the validation and aggregation of the data used in this study. In addition, the authors acknowledge the contributions of the CDC-recognized organizations that collected and submitted the data used in this study. Also, the authors appreciate the assistance of Xuanping Zhang, CDC, with data validation.

**Funding.** Data management, analyses, and manuscript preparation were funded by the CDC.

**Duality of Interest.** No potential conflicts of interest relevant to this article were reported.

**Author Contributions.** M.J.C. contributed to the study concept and design, contributed to the statistical analysis, contributed to the interpretation of data, drafted the manuscript, contributed to the discussion, and reviewed and edited the manuscript and approved the final version. S.M. contributed to the study concept and design, conducted statistical analyses, contributed to the interpretation of data, contributed to the discussion, and reviewed and edited the manuscript and approved the final version. B.P.N. conducted statistical analyses, contributed to the interpretation of data, and reviewed and edited the manuscript and approved the final version. R.E.S. and B.D.S. contributed to the study concept and design, contributed to the interpretation of data, contributed to the discussion, and reviewed and edited the manuscript and approved the final version. M.J.C. is the guarantor of this work and, as such, had full access to all the data in the study and takes responsibility for the integrity of the data and the accuracy of the data analysis.

**Prior Presentation.** Parts of this study were presented in abstract form at the 79th Scientific Sessions of the American Diabetes Association, San Francisco, CA, 7–11 June 2019.

## References

- Centers for Disease Control and Prevention. National Diabetes Statistics Report, 2017. Available from <https://www.diabetesresearch.org/file/2017-National-Diabetes-Statistics-Report-CDC.pdf>. Accessed 10 June 2020
- Ng BP, Shrestha SS, Lanza A, Smith B, Zhang P. Medical expenditures associated with diabetes among adult medicaid enrollees in eight states. *Prev Chronic Dis* 2018;15:E116
- Shrestha SS, Zhang P, Hora IA, Gregg EW. Trajectory of excess medical expenditures 10 years before and after diabetes diagnosis among U.S. adults aged 25–64 years, 2001–2013. *Diabetes Care* 2019;42:62–68
- Yang W, Dall TM, Halder P, et al.; American Diabetes Association. Economic costs of diabetes in the U.S. in 2012. *Diabetes Care* 2013;36:1033–1046
- Knowler WC, Barrett-Connor E, Fowler SE, et al.; Diabetes Prevention Program Research Group. Reduction in the incidence of type 2 diabetes with lifestyle intervention or metformin. *N Engl J Med* 2002;346:393–403
- Lindström J, Ilanne-Parikka P, Peltonen M, et al.; Finnish Diabetes Prevention Study Group. Sustained reduction in the incidence of type 2 diabetes by lifestyle intervention: follow-up of the Finnish Diabetes Prevention Study. *Lancet* 2006;368:1673–1679
- Tuomilehto J, Lindström J, Eriksson JG, et al.; Finnish Diabetes Prevention Study Group. Prevention of type 2 diabetes mellitus by changes in lifestyle among subjects with impaired glucose tolerance. *N Engl J Med* 2001;344:1343–1350
- Ely EK, Gruss SM, Luman ET, Albright AL. Response to comment on Ely et al. A national effort to prevent type 2 diabetes: participant-level

evaluation of CDC's National Diabetes Prevention Program. *Diabetes Care* 2017;40:1331–1341 (Letter). *Diabetes Care* 2017;40:e163

9. Li R, Qu S, Zhang P, et al. Economic evaluation of combined diet and physical activity promotion programs to prevent type 2 diabetes among persons at increased risk: a systematic review for the community preventive services task force. *Ann Intern Med* 2015;163:452–460

10. Albright AL, Gregg EW. Preventing type 2 diabetes in communities across the U.S.: the National Diabetes Prevention Program. *Am J Prev Med* 2013;44(Suppl. 4):S346–S351

11. Amundson HA, Butcher MK, Gohdes D, et al.; Montana Cardiovascular Disease and Diabetes Prevention Program Workgroup. Translating the Diabetes Prevention Program into practice in the general community: findings from the Montana Cardiovascular Disease and Diabetes Prevention Program. *Diabetes Educ* 2009;35:209–210, 213–214, 216–220 *passim*

12. Harwell TS, Vanderwood KK, Hall TO, Butcher MK, Helgeson SD; Montana Cardiovascular Disease and Diabetes Prevention Workgroup. Factors associated with achieving a weight loss goal among participants in an adapted Diabetes Prevention Program. *Prim Care Diabetes* 2011;5:125–129

13. Venditti EM, Kramer MK. Necessary components for lifestyle modification interventions to reduce diabetes risk. *Curr Diab Rep* 2012;12:138–146

14. Leung AWY, Chan RSM, Sea MMM, Woo J. An overview of factors associated with adherence to lifestyle modification programs for weight management in adults. *Int J Environ Res Public Health* 2017;14:922

15. Centers for Disease Control and Prevention. Centers for Disease Control and Prevention Diabetes Prevention Recognition Program: Standards and Operating Procedures, March 1, 2018. Available from <https://www.cdc.gov/diabetes/prevention/pdf/dprp-standards.pdf>. Accessed 22 November 2019

16. Hamman RF, Wing RR, Edelstein SL, et al. Effect of weight loss with lifestyle intervention on risk of diabetes. *Diabetes Care* 2006;29:2102–2107

17. Ritchie ND, Kaufmann PG, Gritz RM, Sauder KA, Holtrop JS. Presessions to the National Diabetes Prevention Program may be a promising strategy to improve attendance and weight loss outcomes. *Am J Health Promot* 2019;33:289–292

18. Batterham M, Tapsell LC, Charlton KE. Predicting dropout in dietary weight loss trials using demographic and early weight change characteristics: implications for trial design. *Obes Res Clin Pract* 2016;10:189–196

19. Fitzpatrick SL, Jeffery R, Johnson KC, et al.; LookAHEAD Research Group. Baseline predictors of missed visits in the LookAHEAD study. *Obesity (Silver Spring)* 2014;22:131–140

20. Funderburk JS, Arigo D, Kenneson A. Initial engagement and attrition in a national weight management program: demographic and health predictors. *Transl Behav Med* 2016;6:358–368

21. Goode RW, Ye L, Sereika SM, et al. Socio-demographic, anthropometric, and psychosocial predictors of attrition across behavioral weight-loss trials. *Eat Behav* 2016;20:27–33

22. Rothberg AE, McEwen LN, Kraftson AT, et al. Factors associated with participant retention in a clinical, intensive, behavioral weight management program. *BMC Obes* 2015;2:11

23. Jiandani D, Wharton S, Rotondi MA, Ardern CI, Kuk JL. Predictors of early attrition and successful weight loss in patients attending an obesity management program. *BMC Obes* 2016;3:14

24. Moroshko I, Brennan L, O'Brien P. Predictors of dropout in weight loss interventions: a systematic review of the literature. *Obes Rev* 2011;12:912–934

25. Spring B, Sohn MW, Locatelli SM, Hadi S, Kahwati L, Weaver FM. Individual, facility, and program factors affecting retention in a national weight management program. *BMC Public Health* 2014;14:363

26. Ritchie ND, Christoe-Frazier L, McFann KK, Havranek EP, Pereira RI. Effect of the National Diabetes Prevention Program on weight loss for English- and Spanish-speaking Latinos. *Am J Health Promot* 2018;32:812–815

27. Elfhag K, Rössner S. Initial weight loss is the best predictor for success in obesity treatment and sociodemographic liabilities increase risk for drop-out. *Patient Educ Couns* 2010;79:361–366

28. Unick JL, Pellegrini CA, Demos KE, Dorfman L. Initial weight loss response as an indicator for providing early rescue efforts to improve long-term treatment outcomes. *Curr Diab Rep*, 2017; 17:69

29. Nhim K, Gruss SM, Porterfield DS, et al. Using a RE-AIM framework to identify promising practices in National Diabetes Prevention Program implementation. *Implement Sci* 2019;14:81

30. Ritchie ND, Baucom KJW, Sauder KA. Benefits of participating with a partner in the National Diabetes Prevention Program. *Diabetes Care* 2020;43:e20–e21

31. Venditti EM, Wylie-Rosett J, Delahanty LM, Mele L, Hoskin MA, Edelstein SL; Diabetes Prevention Program Research Group. Short and long-term lifestyle coaching approaches used to address diverse participant barriers to weight loss and physical activity adherence. *Int J Behav Nutr Phys Act* 2014;11:16

32. Babatunde OA, Adams SA, Wirth MD, et al. Predictors of retention among African Americans in a randomized controlled trial to test the healthy eating and active living in the spirit (HEALS) intervention. *Ethn Dis* 2017;27:265–272

33. Busetto L, Mazza M, Salvalaio S, et al. Obesity treatment in elderly outpatients: predictors of efficacy and drop-out. *Eat Weight Disord* 2009;14:e56–e65

34. Clark MM, Niaura R, King TK, Pera V. Depression, smoking, activity level, and health status: pretreatment predictors of attrition in obesity treatment. *Addict Behav* 1996;21:509–513

35. Fabricatore AN, Wadden TA, Moore RH, Butryn ML, Heymsfield SB, Nguyen AM. Predictors of attrition and weight loss success: results from a randomized controlled trial. *Behav Res Ther* 2009;47:685–691

36. Vinkers CDW, Adriaanse MA, de Ridder DTD. In it for the long haul: characteristics of early and late drop out in a self-management intervention for weight control. *J Behav Med* 2013;36:520–530

37. Hadžibabić MO, Mucalo I, Hrbač P, Matić T, Rahelić D, Božikov V. Factors predictive of drop-out and weight loss success in weight management of obese patients. *J Hum Nutr Diet* 2015;28(Suppl. 2):24–32

38. Rautio N, Jokelainen J, Oksa H, et al. Participation, socioeconomic status and group or individual counselling intervention in individuals at high risk for type 2 diabetes: one-year follow-up study of the FIN-D2D-project. *Prim Care Diabetes* 2012;6:277–283
